# Supplementary material for: Study designs and outcomes used in evaluation studies of hospital-presenting self-harm: protocol for a methodological systematic review
Source: HighWire-hosted journal article supplement (doi:10.1136/bmjopen-2020-044993), 2021-08-01
Supplement: bmjopen-2020-044993supp001_data_supplement.pdf [file bmjopen-2020-044993supp001_data_supplement.pdf]

| Appendix 1. Sample search strategy formatted for Medline (EBSCO)                                                                                                                                                                                                                                                                                                                                                                                                                                                                                                                                                                                                                                                                                                                                                                                                                                                                                                                                                                                                                                        |                                                                                                                                                                                                                                                                                                                                                                                                                                                                                                                                                                                                                                                                                                                                                                                                                                                                                    |                                                                                                                                                                                                                                                                                                                                                                                                                                                                                                                                                                                                                                                                                                                                                                      |
|---------------------------------------------------------------------------------------------------------------------------------------------------------------------------------------------------------------------------------------------------------------------------------------------------------------------------------------------------------------------------------------------------------------------------------------------------------------------------------------------------------------------------------------------------------------------------------------------------------------------------------------------------------------------------------------------------------------------------------------------------------------------------------------------------------------------------------------------------------------------------------------------------------------------------------------------------------------------------------------------------------------------------------------------------------------------------------------------------------|------------------------------------------------------------------------------------------------------------------------------------------------------------------------------------------------------------------------------------------------------------------------------------------------------------------------------------------------------------------------------------------------------------------------------------------------------------------------------------------------------------------------------------------------------------------------------------------------------------------------------------------------------------------------------------------------------------------------------------------------------------------------------------------------------------------------------------------------------------------------------------|----------------------------------------------------------------------------------------------------------------------------------------------------------------------------------------------------------------------------------------------------------------------------------------------------------------------------------------------------------------------------------------------------------------------------------------------------------------------------------------------------------------------------------------------------------------------------------------------------------------------------------------------------------------------------------------------------------------------------------------------------------------------|
| <p>1. (MH "Self Mutilation") OR (MH "Suicide, Attempted") OR (MH "Suicidal Ideation") OR (MH "Self-Injurious Behavior")</p> <p><b>OR TI</b> ( "attempt* suicide" OR "suicide attempt*" OR automutilat* OR "auto mutilat*" OR "automutilat*" OR overdos* OR "self inflicted wound*" OR "self mutilat*" OR "suicid* injur*" OR "self inflicted injur*" OR "self harm*" OR selfharm* or "self injur*" OR "self destruct*" OR selfdestruct* OR "selfpoison*" OR "self-poison*" OR "self cut*" OR selfcut* OR "self immolat*" OR selfimmolat* OR "self-inflict*" OR selfinflict* OR parasucid* OR "para suicid*" )</p> <p><b>OR AB</b> ( "attempt* suicide" OR "suicide attempt*" OR automutilat* OR "auto mutilat*" OR "automutilat*" OR overdos* OR "self inflicted wound*" OR "self mutilat*" OR "suicid* injur*" OR "self inflicted injur*" OR "self harm*" OR selfharm* or "self injur*" OR "self destruct*" OR selfdestruct* OR "selfpoison*" OR "self-poison*" OR "self cut*" OR selfcut* OR "self immolat*" OR selfimmolat* OR "self-inflict*" OR selfinflict* OR parasucid* OR "para suicid*" )</p> | <p>2. (MH "Evidence-Based Emergency Medicine") OR (MH "Emergency Service, Hospital") OR (MH "Emergency Medical Services") OR (MH "Emergency Treatment") OR (MH "Emergency Medicine") OR (MH "Emergency Services, Psychiatric")</p> <p><b>OR TI</b> ( hospital* or "hospital treat*" or "accident department" or "accident and emergency department" or emergency or "ED" or "general hospital*" OR centre* OR center* or "medical* treat*" or repeat* or repetit* or admit* or admission* or "follow up" or follow-up or prospective or epidemiolog* )</p> <p><b>OR AB</b> ( hospital* or "hospital treat*" or "accident department" or "accident and emergency department" or emergency or "ED" or "general hospital*" OR centre* OR center* or "medical* treat*" or repeat* or repetit* or admit* or admission* or "follow up" or follow-up or prospective or epidemiolog* )</p> | <p>3. (MH "Clinical Trial") OR (MH "Randomized Controlled Trial") OR (MH "Non-Randomized Controlled Trials as Topic") OR (MH "Clinical Trials as Topic") OR (MH "Observational Study") OR (MH "Case-Control Studies") OR (MH "Cohort Studies") OR (MH "Validation Study") OR (MH "Controlled Before-After Studies") OR (MH "Interrupted Time Series Analysis") OR (MH "Evaluation Studies") OR (MH "Propensity Score")</p> <p><b>OR TI</b> ( random* or trial* or placebo or group* or intervention* OR "time series" OR "propensity scor*" OR "survival analysis" OR "survival analyses" )</p> <p><b>OR AB</b> ( random* or trial* or placebo or group* or intervention* OR "time series" OR "propensity scor*" OR "survival analysis" OR "survival analyses" )</p> |
| NOT                                                                                                                                                                                                                                                                                                                                                                                                                                                                                                                                                                                                                                                                                                                                                                                                                                                                                                                                                                                                                                                                                                     |                                                                                                                                                                                                                                                                                                                                                                                                                                                                                                                                                                                                                                                                                                                                                                                                                                                                                    |                                                                                                                                                                                                                                                                                                                                                                                                                                                                                                                                                                                                                                                                                                                                                                      |
| <p>a. PT ( "case report" OR "case reports" OR news OR letter* OR comment* )</p>                                                                                                                                                                                                                                                                                                                                                                                                                                                                                                                                                                                                                                                                                                                                                                                                                                                                                                                                                                                                                         | <p>b. (MH "Mortality, Premature") OR (MH "Suicide, Completed") OR (MH "Suicide, Assisted") OR (MH "Genes, Transgenic, Suicide") OR (MH "Cell Line, Tumor")</p>                                                                                                                                                                                                                                                                                                                                                                                                                                                                                                                                                                                                                                                                                                                     | <p>c. TI ( cancer* OR chemotherapy OR tumor* or tumour* ) OR AB ( cancer* OR chemotherapy OR tumor* or tumour* )</p>                                                                                                                                                                                                                                                                                                                                                                                                                                                                                                                                                                                                                                                 |
| <p>[1 AND 2 AND 3]<br/> [a OR b OR c]<br/> [1 AND 2 AND 3] NOT [a OR b OR c]<br/> Limit: 01012000-26082020, English</p>                                                                                                                                                                                                                                                                                                                                                                                                                                                                                                                                                                                                                                                                                                                                                                                                                                                                                                                                                                                 |                                                                                                                                                                                                                                                                                                                                                                                                                                                                                                                                                                                                                                                                                                                                                                                                                                                                                    |                                                                                                                                                                                                                                                                                                                                                                                                                                                                                                                                                                                                                                                                                                                                                                      |
